# Supplementary material for: Morphological and molecular characterization of Brazilian populations of Diatraea saccharalis (Fabricius, 1794) (Lepidoptera: Crambidae) and the evolutionary relationship among species of Diatraea Guilding
Source: PubMed Central journal article supplement (PMC5690654; doi:10.1371/journal.pone.0186266), 2017-11-16
Supplement: pone.0186266.s001.pdf [file pone.0186266.s001.pdf]

Supplementary Table 1. Characteristics of the 11 microsatellite loci from *Diatraea saccharalis*.

| Locus | GeneBank accession | Primer nucleotide sequence (5'-3')                  | Repeat motif | Ta (°C) | Size range (bp) |
|-------|--------------------|-----------------------------------------------------|--------------|---------|-----------------|
| Dsc1  | GF111048           | F CGAGGCTATATTTGCGTGTG<br>R GATGATGGAGTTGGAAGGTGA   | (TG)10       | 56      | 180-192         |
| Dsc2  | GF111061           | F GCGGTGCCTCTTTGTCATA<br>R TTGACCAACTACTGCAAGACG    | (CA)19       | 60      | 188-230         |
| Dsc3  | GF111049           | F CCATCAAGCTCCTTCTAAGAGAC<br>R CCTTGCTCAGTTACCATTCG | (AC)11       | 56      | 250-274         |
| Dsc5  | GF111050           | F TCTTGCCTTTGCTCTTGA<br>R GCGGGGTCAGCTAGTTATTC      | (TG)19       | 60      | 146-190         |
| Dsc7  | GF111051           | F TGTCGAGCTACTCCATGCTT<br>R TGAGACTGAACACTGGCAAGA   | (ATG)6       | 60      | 214-250         |
| Dsc9  | GF111052           | F AACCTTCGATGAGCTACTGC<br>R TGTGGTGATTTGTTTGCTTG    | (TG)16       | 56      | 160-182         |
| Dsc10 | GF111060           | F GGTCCGCGTTTGTATTGTT<br>R TCAAGTGCTCCTAAAACACGA    | (GT)7        | 56      | 270-280         |
| Dsc11 | GF111990           | F ATACGGCTTCATTGCTTC<br>R GGTTTCGCACTCATCACG        | (GT)10       | 54      | 220-228         |
| Dsc13 | GF111053           | F CGTGGACTAACCCATAGAAGAT<br>R GGTTTAGCAGAACTTGGCATA | (GT)18       | 54      | 220-270         |
| Dsc19 | GF111058           | F CACACACGAACACACACGA<br>R ATGGTTGGGTCTTTCCTTTT     | (CA)10       | 60      | 160-170         |
| Dsc20 | GF111059           | F TTGGCAGAGTTGTGGGTAAC<br>R ACAGCAGCATCATCAGAAGG    | (AG)8        | 54      | 222-230         |

F = forward primer sequences; R = reverse primer sequences; Ta = annealing temperature;
