# Supplementary material for: Morphological and molecular characterization of Brazilian populations of Diatraea saccharalis (Fabricius, 1794) (Lepidoptera: Crambidae) and the evolutionary relationship among species of Diatraea Guilding
Source: PubMed Central journal article supplement (PMC5690654; doi:10.1371/journal.pone.0186266), 2017-11-16
Supplement: pone.0186266.s002.pdf [file pone.0186266.s002.pdf]

Supplementary Table 2 – Hierarchical analysis of molecular variance (AMOVA) for population genetic structure of *Diatraea saccharalis* with a mitochondrial (COI) region marker.

| Hierarchical levels           | d.f. | Sum of Squares | Variance components | Variance (%) | Fixation Indices   | P valor |
|-------------------------------|------|----------------|---------------------|--------------|--------------------|---------|
| Two-hierarchical-levels       |      |                |                     |              |                    |         |
| Among Populations             | 2    | 0.184          | -0.00067            | -0.63        | -0.00625           | 0.45974 |
| Within Populations            | 79   | 8.463          | 0.10712             | 100.63       |                    |         |
| Total                         | 81   | 8.646          | 0.10645             |              |                    |         |
| Two-hierarchical-levels       |      |                |                     |              |                    |         |
| Among Host                    | 1    | 0.076          | -0.00079            | -0.74        | -0.00742           | 0.6998  |
| Within Host                   | 80   | 8.57           | 0.10712             | 100.74       |                    |         |
| Total                         | 81   | 8.646          | 0.10634             |              |                    |         |
| Three-hierarchical-levels     |      |                |                     |              |                    |         |
| Among Populations             | 2    | 0.184          | 0.00271             | 2.54         | $F_{SC} = -0.046$  | 1       |
| Among host within populations | 2    | 0.088          | -0.00478            | -4.48        | $F_{CT} = 0.02537$ | 0.3993  |
| Within Host                   | 77   | 8.375          | 0.10877             | 101.94       | $F_{ST} = -0.0194$ | 0.7271  |
| Total                         | 81   | 8.646          | 0.10669             |              |                    |         |
