# Supplementary material for: Morphological and molecular characterization of Brazilian populations of Diatraea saccharalis (Fabricius, 1794) (Lepidoptera: Crambidae) and the evolutionary relationship among species of Diatraea Guilding
Source: PubMed Central journal article supplement (PMC5690654; doi:10.1371/journal.pone.0186266), 2017-11-16
Supplement: pone.0186266.s003.pdf [file pone.0186266.s003.pdf]

Supplementary Table 3. Estimates of pairwise  $F_{st}$  (lower diagonal) and p-values (upper diagonal) among populations of *Diatraea saccharalis* and *Diatraea impersonatella*, based on the variation of the mitochondrial COI gene.

|                       | Jaboticabal_Sugarcane | Morrinhos_Corn  | Morrinhos_Sugarcane | Piracicaba_Corn | Piracicaba_Sugarcane | Maceio_Sugarcane |
|-----------------------|-----------------------|-----------------|---------------------|-----------------|----------------------|------------------|
| Jaboticabal_Sugarcane |                       | 0.436           | 1.000               | 1.000           | 1.000                | 0.000            |
| Morrinhos_Corn        | <b>0.05546</b>        |                 | 1.000               | 0.448           | 0.300                | 0.000            |
| Morrinhos_Sugarcane   | <b>-0.33172</b>       | <b>-0.31765</b> |                     | 1.000           | 1.000                | 0.008            |
| Piracicaba_Corn       | <b>-0.01366</b>       | <b>-0.00878</b> | <b>-0.31555</b>     |                 | 1.000                | 0.000            |
| Piracicaba_Sugarcane  | <b>-0.02813</b>       | <b>0.04</b>     | <b>-0.29095</b>     | <b>-0.02391</b> |                      | 0                |
| Maceio_Sugarcane      | <b>0.98657</b>        | <b>0.97568</b>  | <b>0.96682</b>      | <b>0.9829</b>   | <b>0.9857</b>        |                  |
