# Supplementary material for: Morphological and molecular characterization of Brazilian populations of Diatraea saccharalis (Fabricius, 1794) (Lepidoptera: Crambidae) and the evolutionary relationship among species of Diatraea Guilding
Source: PubMed Central journal article supplement (PMC5690654; doi:10.1371/journal.pone.0186266), 2017-11-16
Supplement: pone.0186266.s004.pdf [file pone.0186266.s004.pdf]

Supplementary Table 4. Genetic variability and coefficient of inbreeding for microsatellite loci evaluated in *Diatraea saccharalis* populations.

| <b>Locus</b>   | <b>A</b>    | <b>Ho ± SE</b>  | <b>He ± SE</b>  | <b>F<sub>IS</sub> ± SE</b> |
|----------------|-------------|-----------------|-----------------|----------------------------|
| Dsc1           | 3           | 0.3125 ± 0.027  | 0.54775 ± 0.036 | 0.42275 ± 0.060            |
| Dsc2           | 3           | 0.60025 ± 0.078 | 0.50575 ± 0.051 | -0.20625 ± 0.161           |
| Dsc3           | 6           | 0.3645 ± 0.104  | 0.59025 ± 0.077 | 0.3675 ± 0.184             |
| Dsc5           | 4           | 0.3915 ± 0.101  | 0.632 ± 0.005   | 0.37825 ± 0.162            |
| Dsc7           | 4           | 0.47925 ± 0.100 | 0.504 ± 0.026   | 0.01375 ± 0.245            |
| Dsc9           | 6           | 0.28575 ± 0.121 | 0.51675 ± 0.109 | 0.472 ± 0.156              |
| Dsc10          | 3           | 0.34975 ± 0.110 | 0.467 ± 0.095   | 0.34225 ± 0.152            |
| Dsc11          | 7           | 0.27 ± 0.160    | 0.22675 ± 0.134 | -0.1885 ± 0.013            |
| Dsc13          | 6           | 0.602 ± 0.088   | 0.6325 ± 0.081  | 0.05225 ± 0.056            |
| Dsc19          | 7           | 0.88525 ± 0.057 | 0.625 ± 0.026   | -0.4135 ± 0.045            |
| Dsc20          | 2           | 0.084 ± 0.068   | 0.12275 ± 0.071 | 0.3455 ± 0.309             |
| <b>Average</b> | <b>4.64</b> | <b>0.42</b>     | <b>0.49</b>     | <b>0.14</b>                |

A - Number of alleles, Ho - Observed heterozygosity, He - Expected heterozygosity, F<sub>IS</sub> - Inbreeding coefficient
