# Supplementary material for: Morphological and molecular characterization of Brazilian populations of Diatraea saccharalis (Fabricius, 1794) (Lepidoptera: Crambidae) and the evolutionary relationship among species of Diatraea Guilding
Source: PubMed Central journal article supplement (PMC5690654; doi:10.1371/journal.pone.0186266), 2017-11-16
Supplement: pone.0186266.s005.pdf [file pone.0186266.s005.pdf]

Supplementary Table 5 – Nuclear microsatellite private alleles observed in four populations of *Diatraea saccharalis*.

| Population            | Locus | Allele | Frequency |
|-----------------------|-------|--------|-----------|
| Jaboticabal_Sugarcane | Dsc11 | 210    | 0.1363    |
|                       | Dsc11 | 254    | 0.0227    |
|                       | Dsc11 | 256    | 0.0454    |
| Morrinhos_Corn        | Dsc3  | 282    | 0.4375    |
|                       | Dsc9  | 188    | 0.1428    |
|                       | Dsc11 | 194    | 0.1250    |
|                       | Dsc11 | 220    | 0.0625    |
|                       | Dsc13 | 314    | 0.1875    |
|                       | Dsc19 | 203    | 0.1250    |
| Piracicaba_Sugarcane  | Dsc2  | 228    | 0.2391    |
|                       | Dsc19 | 169    | 0.0208    |
|                       | Dsc19 | 175    | 0.0416    |
