# Supplementary material for: Morphological and molecular characterization of Brazilian populations of Diatraea saccharalis (Fabricius, 1794) (Lepidoptera: Crambidae) and the evolutionary relationship among species of Diatraea Guilding
Source: PubMed Central journal article supplement (PMC5690654; doi:10.1371/journal.pone.0186266), 2017-11-16
Supplement: pone.0186266.s006.pdf [file pone.0186266.s006.pdf]

Supplementary Table 6 - Estimates of pairwise  $F_{st}$  among the *Diatraea saccharalis* populations based on the variation of eleven microsatellite loci.

|                       | Jaboticabal_Sugarcane | Morrinhos_Corn | Piracicaba_Sugarcane | Piracicaba_Corn |
|-----------------------|-----------------------|----------------|----------------------|-----------------|
| Jaboticabal_Sugarcane | 0                     |                |                      |                 |
| Morrinhos_Corn        | 0.1415                | 0              |                      |                 |
| Piracicaba_Sugarcane  | 0.1578                | 0.1046         | 0                    |                 |
| Piracicaba_Corn       | 0.1812                | 0.0835         | 0.1533               | 0               |
